# Supplementary material for: Hemojuvelin deficiency promotes liver mitochondrial dysfunction and predisposes mice to hepatocellular carcinoma
Source: PubMed Central journal article supplement (PMC8863832; doi:10.1038/s42003-022-03108-2), 2022-02-22
Supplement: 42003_2022_3108_MOESM2_ESM.pdf [file 42003_2022_3108_MOESM2_ESM.pdf]

Supplementary Figures and Tables

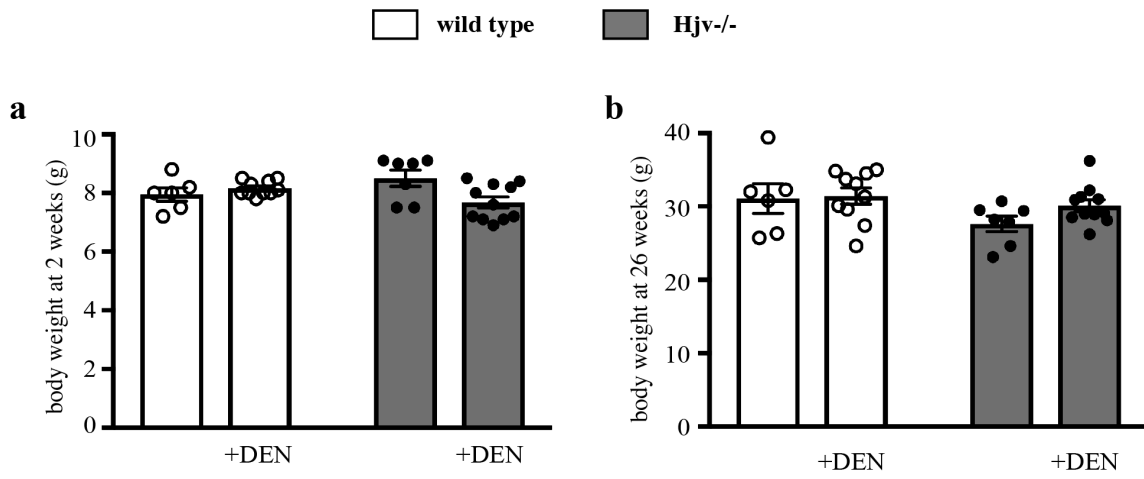

**Fig. S1.** Body weights of mice at the beginning (a) and at the endpoint (b) of the experiment described in Fig. 1. Data are presented as the mean  $\pm$  SEM.

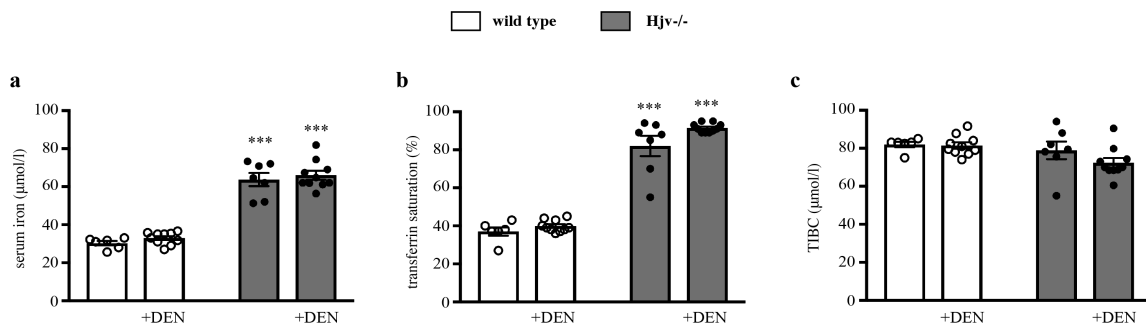

**Fig. S2.** Serum biochemistry data of mice at the endpoint of the experiment described in Fig. 1. (a) Serum iron. (b) Transferrin saturation. (c) Total iron-binding capacity (TIBC). Data are presented as the mean  $\pm$  SEM. Statistical analysis was performed by two-way ANOVA. Statistically significant differences across genotypes are indicated by \*\*\* ( $p < 0.001$ ).

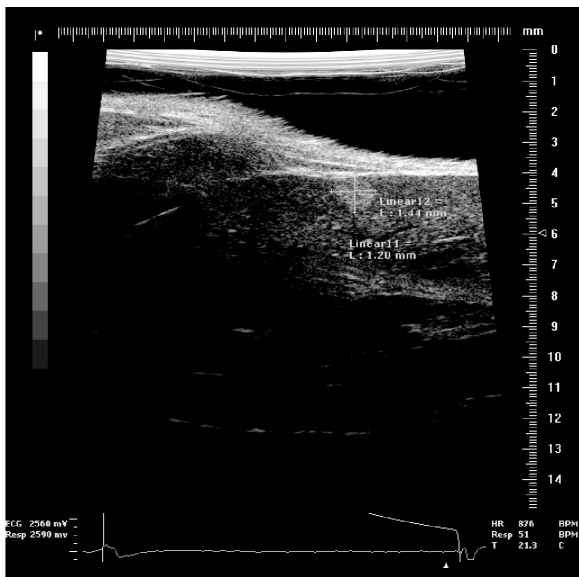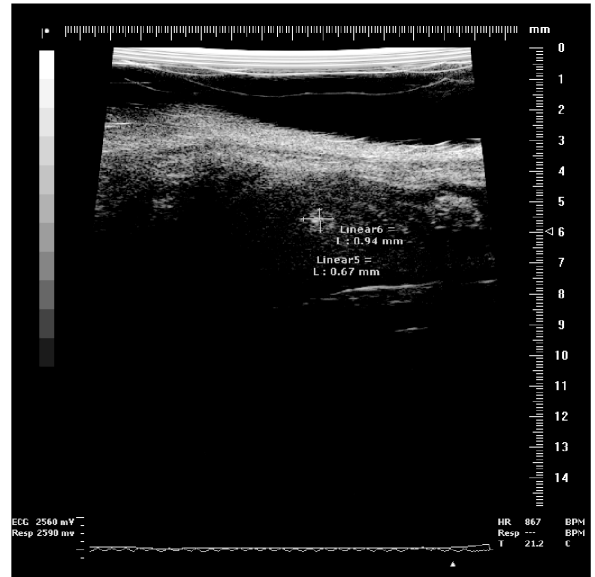

**Fig. S3.** Abdominal ultrasound of two representative 20-week-old *Hvj*<sup>-/-</sup> mice showing HCC lesions.

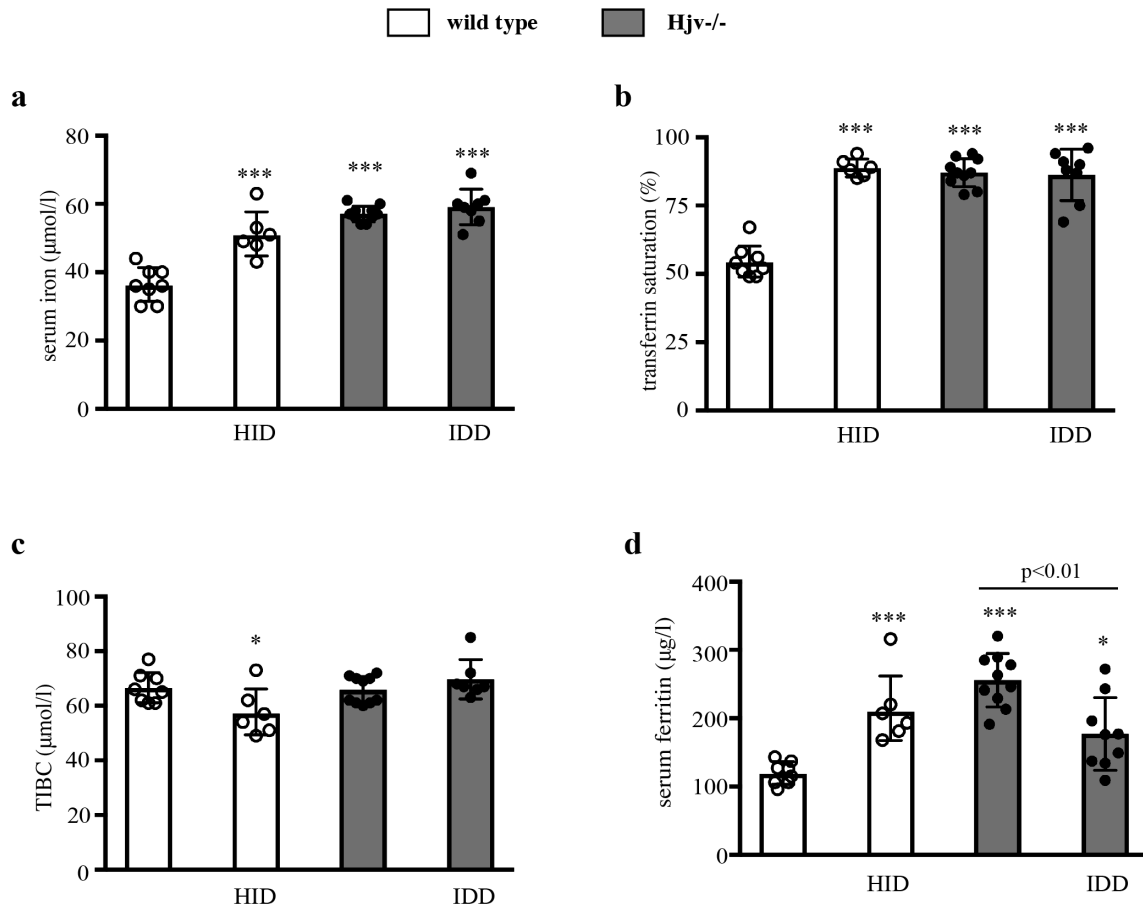

**Fig. S4.** Serum biochemistry data of mice at the endpoint of the experiment described in Fig. 5. (a) Serum iron. (b) Transferrin saturation. (c) Total iron-binding capacity (TIBC). (d) Serum ferritin. Data are presented as the mean  $\pm$  SEM. Statistical analysis was performed by two-way ANOVA. Statistically significant differences across genotypes are indicated by \* ( $p<0.05$ ) or \*\*\* ( $p<0.001$ ).

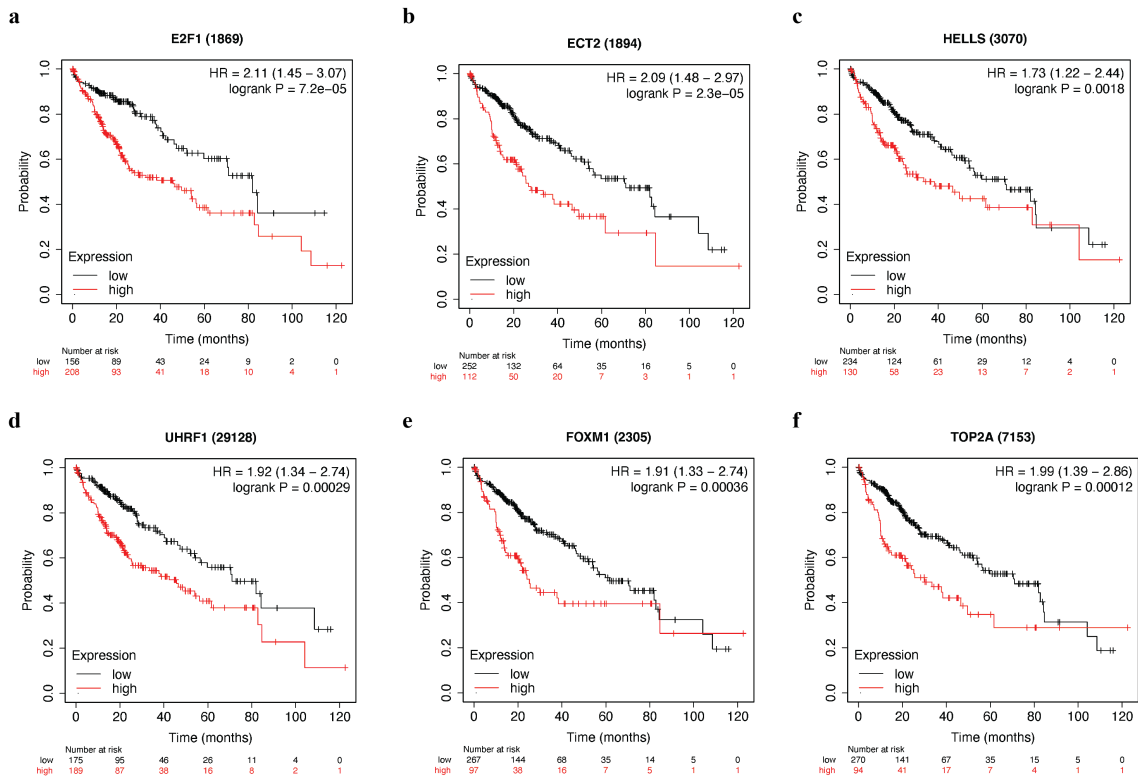

**Fig. S5.** High expression of oncofetal genes is associated with poor prognosis in HCC. Survival analysis in HCC patients plotted against expression of: (a) *E2F1*, (b) *ECT2*, (c) *HELLS*, (d) *UHRF1*, (e) *FOXM1* and (f) *TOP2A*. All RNAseq data were obtained from the TCGA HCC dataset.

**Table S1.** Spearman's rank correlation coefficients and p values of expression levels among *HAMP*, *HJV* and the oncofetal marker genes *E2F1*, *ECT2*, *FOXM1*, *TOP2A*, *HELLS* and *UHRF1*.

**Spearman's rank correlation coefficients**

| gene  | HAMP    | HFE2    | E2F1    | ECT2    | FOXM1   | TOP2A   | HELLS   | UHRF1   |
|-------|---------|---------|---------|---------|---------|---------|---------|---------|
| HAMP  | 1       | 0.073   | -0.168  | -0.1963 | -0.2286 | -0.2486 | -0.1428 | -0.1699 |
| HJV   | 0.073   | 1       | -0.2799 | -0.4864 | -0.3874 | -0.4366 | -0.4284 | -0.4379 |
| E2F1  | -0.168  | -0.2799 | 1       | 0.6545  | 0.7763  | 0.7456  | 0.7408  | 0.7835  |
| ECT2  | -0.1963 | -0.4864 | 0.6545  | 1       | 0.8263  | 0.8681  | 0.7598  | 0.8066  |
| FOXM1 | -0.2286 | -0.3874 | 0.7763  | 0.8263  | 1       | 0.8941  | 0.8202  | 0.846   |
| TOP2A | -0.2486 | -0.4366 | 0.7456  | 0.8681  | 0.8941  | 1       | 0.8513  | 0.8642  |
| HELLS | -0.1428 | -0.4284 | 0.7408  | 0.7598  | 0.8202  | 0.8513  | 1       | 0.8318  |
| UHRF1 | -0.1699 | -0.4379 | 0.7835  | 0.8066  | 0.846   | 0.8642  | 0.8318  | 1       |

**p-values**

|       | HAMP     | HFE2     | E2F1     | ECT2     | FOXM1    | TOP2A    | HELLS    | UHRF1    |
|-------|----------|----------|----------|----------|----------|----------|----------|----------|
| HAMP  | 1.00E-04 | 0.1643   | 0.0013   | 2.00E-04 | 1.00E-04 | 1.00E-04 | 0.0063   | 0.0011   |
| HJV   | 0.1643   | 1.00E-04 | 1.00E-04 | 1.00E-04 | 1.00E-04 | 1.00E-04 | 1.00E-04 | 1.00E-04 |
| E2F1  | 0.0013   | 1.00E-04 | 1.00E-04 | 1.00E-04 | 1.00E-04 | 1.00E-04 | 1.00E-04 | 1.00E-04 |
| ECT2  | 2.00E-04 | 1.00E-04 | 1.00E-04 | 1.00E-04 | 1.00E-04 | 1.00E-04 | 1.00E-04 | 1.00E-04 |
| FOXM1 | 1.00E-04 | 1.00E-04 | 1.00E-04 | 1.00E-04 | 1.00E-04 | 1.00E-04 | 1.00E-04 | 1.00E-04 |
| TOP2A | 1.00E-04 | 1.00E-04 | 1.00E-04 | 1.00E-04 | 1.00E-04 | 1.00E-04 | 1.00E-04 | 1.00E-04 |
| HELLS | 0.0063   | 1.00E-04 | 1.00E-04 | 1.00E-04 | 1.00E-04 | 1.00E-04 | 1.00E-04 | 1.00E-04 |
| UHRF1 | 0.0011   | 1.00E-04 | 1.00E-04 | 1.00E-04 | 1.00E-04 | 1.00E-04 | 1.00E-04 | 1.00E-04 |
