# Supplementary material for: Hemojuvelin deficiency promotes liver mitochondrial dysfunction and predisposes mice to hepatocellular carcinoma
Source: PubMed Central journal article supplement (PMC8863832; doi:10.1038/s42003-022-03108-2), 2022-02-22
Supplement: 42003_2022_3108_MOESM3_ESM.pdf [file 42003_2022_3108_MOESM3_ESM.pdf]

## Description of Additional Supplementary Files

**File name:** Supplementary Data 1

**Description:** Combined quantitative protein data for the DEN and dietary iron studies.

**File name:** Supplementary Data 2

**Description:** Complete functional enrichment data of the DEN study.

**File name:** Supplementary Data 3

**Description:** Complete functional enrichment data of the dietary iron study.

**File name:** Supplementary Data 4

**Description:** Distribution of liver proteins identified in the DEN and dietary iron studies, compared to ref. 18.

**File name:** Supplementary Data 5

**Description:** Source data underlying the graphs and charts.
